# Supplementary material for: Theoretical study on the difference of OH vibrational spectra between OH−(H2O)3 and OH−(H2O)4
Source: Royal Society of Chemistry journal article supplement (doi:10.1039/c2cp23203k), 2012-01-01
Supplement: c2cp23203k.pdf [file c2cp23203k.pdf]

## Electronic Supplementary Information

# Theoretical Study on the Difference of OH Vibrational Spectra between $\text{OH}^-(\text{H}_2\text{O})_3$ and $\text{OH}^-(\text{H}_2\text{O})_4$

Masato Morita and Kaito Takahashi\*

Institute of Atomic and Molecular Sciences, Academia Sinica PO Box 23-166 Taipei 10617 Taiwan R.O.C.

E-mail: kt@gate.sinica.edu.tw

## Contents

**Calculation detail**

**Vibrational spectra**

**Optimized geometry**

## Calculation detail

### Hamiltonian

Within the truncated functional space defined in the text, concrete expression of the 0-th order Hamiltonian  $H_0$  in text eq.(2) is given as follows;

$$\begin{aligned}
 H_0 &= \sum_I^{N_{\text{unit}}} H_0^I \\
 &\approx \sum_I^{N_{\text{unit}}} |0\rangle \langle 0| + \sum_I^{N_{\text{unit}}} \sum_k^{I_{\text{state}}} \hat{T}_k^I |0\rangle \langle 0| (\hat{T}_k^I)^t \\
 &\quad + \sum_I^{N_{\text{unit}}} \sum_{J>I}^{N_{\text{unit}}} \sum_k^{I_{\text{state}}} \sum_l^{J_{\text{state}}} \hat{T}_k^I \hat{T}_l^J |0\rangle \langle 0| (\hat{T}_k^I)^t (\hat{T}_l^J)^t,
 \end{aligned}
 \tag{A-1}$$

where  $E_k^I$  is the energy of  $k$ -th vibrational state of unit  $I$ . Here the following orthogonal conditions are assumed as,

$$\langle \Phi_k^I | H_0 | \Phi_l^J \rangle = \delta_{I,J} \delta_{k,l} E_k^I, \quad \langle \Phi_k^I | \Phi_l^J \rangle = \delta_{I,J} \delta_{k,l}. \tag{A-2}$$

These conditions are valid for our calculations because we are considering the fundamental OH stretching energy region and the proton transfer effects are negligible in  $\text{OH}^-(\text{H}_2\text{O})_3$  and  $\text{OH}^-(\text{H}_2\text{O})_4$ . As a result,  $H_0$  contributes only to the diagonal part of the total Hamiltonian matrix.

On the other hand, the interaction part  $V_{\text{LLC}}$ , contributes both to the diagonal and the off-diagonal parts. In particular, for diagonal part, all coupling terms included in  $V_{\text{LLC}}$  give finite values, which result in the diagonal corrections for eigenvalues of  $H_0$ . For the off-diagonal parts, there exist the selection rules, which depend on the combination of the unit and state numbers of the excitation operators for bra and ket, and the unit number of the coupling terms. Here it is enough to consider the upper triangle elements of the Hamiltonian matrix because the matrix is real symmetric.

In the following, we summarize the selection rule for the coupling terms in  $V_{\text{LLC}}$  in making the off-diagonal part of the Hamiltonian. For simplicity, we describe the direct product basis functions defined in text eq. (5) as;

$$\hat{T}_m^M |0\rangle \equiv |\hat{T}_m^M\rangle, \quad \langle 0 | (\hat{T}_m^M)^t \equiv \langle \hat{T}_m^M |, \quad T_m^M T_n^N |0\rangle \equiv |T_m^M T_n^N\rangle, \quad \text{and} \quad \langle 0 | (\hat{T}_m^M)^t (\hat{T}_n^N)^t \equiv \langle \hat{T}_m^M \hat{T}_n^N | \quad (M < N).
 \tag{A-3}$$

1). Bra is the ground state basis and ket is a single unit excited basis:

$$\langle 0 | C_{ij}^{IJ} (q_i^I - q_{i,eq}^I) (q_j^J - q_{j,eq}^J) | T_m^M \rangle = 0, \quad \text{if } (I \neq M \text{ and } J \neq M)$$

2). Bra is a single unit excited state basis and ket is a single unit excited basis:

$$\langle T_k^K | C_{ij}^{IJ} (q_i^I - q_{i,eq}^I) (q_j^J - q_{j,eq}^J) | T_m^M \rangle = 0,$$

$$\text{2-1) if } \{K = M \text{ and } (K \neq I \text{ and } K \neq J)\}$$

Note that when  $K=M$ , only  $k \neq m$  are off-diagonal elements.

2-2)

$$\text{if } [K \neq M \text{ and } \{(K \neq I \text{ and } K \neq J) \text{ or } (M \neq I \text{ and } M \neq J)\}]$$

3). Bra is the ground state basis and ket is a double units excited basis:

$$\langle 0 | C_{ij}^{IJ} (q_i^I - q_{i,eq}^I) (q_j^J - q_{j,eq}^J) | T_m^M T_n^N \rangle = 0,$$

$$\text{if } \{(M \neq I \text{ and } M \neq J) \text{ or } (N \neq I \text{ and } N \neq J)\}$$

4). Bra is a single unit excited basis and ket is a double units excited basis:

$$\langle T_k^K | C_{ij}^{IJ} (q_i^I - q_{i,eq}^I)(q_j^J - q_{j,eq}^J) | T_m^M T_n^N \rangle = 0,$$

$$4-1) \text{ if } (K \neq M \text{ and } K \neq N)$$

$$4-2) \text{ if } \{K = M \text{ and } (N \neq I \text{ and } N \neq J)\}$$

$$4-3) \text{ if } \{K = N \text{ and } (M \neq I \text{ and } M \neq J)\}$$

$$4-4) \text{ if } [K = M \text{ and } \{(K \neq I \text{ and } K \neq J) \text{ and } (k \neq m)]$$

$$4-5) \text{ if } [K = N \text{ and } \{(K \neq I \text{ and } K \neq J) \text{ and } (k \neq n)]$$

5). Bra is a double units excited basis and ket is a double units excited basis:

$$\langle T_k^K T_l^L | C_{ij}^{IJ} (q_i^I - q_{i,eq}^I)(q_j^J - q_{j,eq}^J) | T_m^M T_n^N \rangle = 0,$$

$$5-1)$$

$$\text{if } \{(K \neq M \text{ and } K \neq N) \text{ and } (L \neq M \text{ and } L \neq N)\}$$

$$5-2)$$

$$\text{if } \{(K = M \text{ and } L = N) \text{ and } (K \neq I \text{ and } K \neq J) \text{ and } (L \neq I \text{ and } L \neq J)\}$$

$$5-3)$$

$$\text{if } \{(K = M \text{ and } L = N) \text{ and } (K = I \text{ or } K = J) \text{ and } (L \neq I \text{ and } L \neq J) \text{ and } (l \neq n)\}$$

$$5-4)$$

$$\text{if } \{(K = M \text{ and } L = N) \text{ and } (K \neq I \text{ and } K \neq J) \text{ and } (L = I \text{ or } L = J) \text{ and } (k \neq m)\}$$

$$5-5)$$

$$\text{if } [(K = M \text{ and } L \neq N) \text{ and } \{(L = I \text{ and } N = J) \text{ or } (L = J \text{ and } N = I)\} \text{ and } (k \neq m)]$$

$$5-6)$$

$$\text{if } \{K = N \text{ and } (L = J \text{ and } M = I) \text{ and } (k \neq n)\}$$

In all other cases, the contributions of the  $V_{LLC}$  to the total Hamiltonian matrix elements are calculated by utilizing the DIPJ0DVR program (J. R. Henderson, C. R. Le Sueur and J. Tennyson, *Comput. Phys. Commun.*, 1993, **75**, 379) with the local water wavefunctions and by the finite difference method with the local OH<sup>-</sup> 1-dimensional wavefunction. For example, the expectation value of

$$\langle 0 | C_{ij}^{IJ} (q_i^I - q_{i,eq}^I)(q_j^J - q_{j,eq}^J) | 0 \rangle$$

is obtained from the product of the expectation values of the local unit wavefunctions as follow;

$$\langle 0 | C_{ij}^{IJ} (q_i^I - q_{i,eq}^I)(q_j^J - q_{j,eq}^J) | 0 \rangle = C_{ij}^{IJ} \langle \Phi_0^I | (q_i^I - q_{i,eq}^I) | \Phi_0^I \rangle \cdot \langle \Phi_0^J | (q_j^J - q_{j,eq}^J) | \Phi_0^J \rangle.$$

## Transition moments

By solving the eigenvalue problem of the total Hamiltonian matrix, energies of vibrational states and corresponding wavefunctions are obtained. For the calculation of the intensity given in the text eq. (7), both the excitation energy and transition moment vector are needed. The transition moment vector between initial ground state  $\Psi_0$  and the final excited state  $\Psi_f$  is written as follows;

$$\langle \Psi_0 | \hat{\boldsymbol{\mu}} | \Psi_f \rangle = \langle \Psi_0 | \sum_I^{N_{unit}} \hat{\boldsymbol{\mu}}^I(q_1^I, q_2^I, q_3^I) | \Psi_f \rangle, \quad (\text{A-4})$$

where the dipole moment function (DMF),  $\hat{\boldsymbol{\mu}}$ , is assumed as the sum of DMFs of the all monomer units, and the wavefunctions are given by the liner combination of the direct product basis functions as,

$$\Psi = c_0 | 0 \rangle + \sum_I^{N_{unit}} \sum_k^{Istate} c_k^I | \hat{T}_k^I \rangle + \sum_I^{N_{unit}} \sum_{J>I}^{N_{unit}} \sum_k^{Istate} \sum_l^{Jstate} c_{k,l}^{I,J} | \hat{T}_k^I \hat{T}_l^J \rangle. \quad (\text{A-5})$$

Note that the above  $\{c\}$  are the expansion coefficients and different from the expansion coefficients  $\{C\}$  of coupling terms.

In the evaluation of (A-5), depending on the combination of the unit and state numbers of the excitation operators for bra and ket, and the unit number of the DMF, some types of segment becomes zero due to the above definition of  $\hat{\boldsymbol{\mu}}$  and the orthogonal relation in (A-3).

1). Bra is the ground state basis:

$$\langle 0 | \hat{\boldsymbol{\mu}}^I | \hat{T}_m^M \rangle = 0 \quad \text{if } (I \neq M), \quad \langle 0 | \hat{\boldsymbol{\mu}}^I | \hat{T}_m^M \hat{T}_n^N \rangle = 0 \quad (\forall M, N)$$

2). Bra is a single unit excited basis:

$$\langle \hat{T}_m^M | \boldsymbol{\mu}^I | 0 \rangle = 0 \quad \text{if } (I \neq M), \quad \langle \hat{T}_k^K | \boldsymbol{\mu}^I | \hat{T}_m^M \rangle = 0 \quad \text{if } (K \neq M \text{ or } K = M \neq I)$$

$$\langle \hat{T}_k^K | \boldsymbol{\mu}^I | \hat{T}_m^M \hat{T}_n^N \rangle = 0$$

- 1) if  $(K \neq M \text{ and } K \neq N)$
- 2) if  $(K = M \text{ and } I \neq N)$
- 3) if  $(K = N \text{ and } I \neq M)$
- 4) if  $(K = M \text{ and } I = N \text{ and } k \neq m)$
- 5) if  $(K = N \text{ and } I = M \text{ and } k \neq n)$

3). Bra is a double unit excited basis:

$$\langle \hat{T}_k^K \hat{T}_l^L | \boldsymbol{\mu}^I | 0 \rangle = 0 \quad (\forall K, L)$$

$$\langle \hat{T}_k^K \hat{T}_l^L | \boldsymbol{\mu}^I | \hat{T}_m^M \rangle = 0$$

- 1) if  $(K \neq M \text{ and } L \neq M)$

- 2)  $if(K = M \text{ and } I \neq L)$
- 3)  $if(L = M \text{ and } I \neq K)$
- 4)  $if(K = M \text{ and } I = L \text{ and } k \neq m)$
- 5)  $if(L = M \text{ and } I = K \text{ and } l \neq m)$

$$\langle \hat{T}_k^K \hat{T}_l^L | \boldsymbol{\mu}^I | \hat{T}_m^M \hat{T}_n^N \rangle = 0$$

- 1)  $if(K \neq M)$
- 2)  $if(K = M \text{ and } L \neq N)$
- 3)  $if\{K = M \text{ and } L = N \text{ and } (k \neq m \text{ and } l \neq n)\}$
- 4)  $if(K = M \text{ and } L = N \text{ and } k \neq m \text{ and } l = n \text{ and } I \neq K)$
- 5)  $if(K = M \text{ and } L = N \text{ and } k = m \text{ and } l \neq n \text{ and } I \neq L)$ .

All the transition moment values are obtained by using DIPJ0DVR program (J. R. Henderson, C. R. Le Sueur and J. Tennyson, *Comput. Phys. Commun.*, 1993, **75**, 379) and the finite difference method, with local unit wavefunctions and dipole moment functions.

## Vibrational spectra

We will use the notation dwat4 for the deprotonated 4 waters cluster, namely OH(H<sub>2</sub>O)<sub>3</sub>, and dwat5 for OH<sup>-</sup>(H<sub>2</sub>O)<sub>4</sub> as used in the text.

Lists of the excitation energies (cm<sup>-1</sup>) and intensities (km/mol) of vibrational spectra calculated with local monomer unit model (LU) and LU plus inter unit coupling by the lowest order linear-linear coupling terms (LU+LLC). The potential energy surface (PES) and dipole moment function (DMF) for each monomer unit were calculated by B3LYP/6-31+G(d,p). Figures of corresponding stick spectra were also shown.

As described in the text eq. (6), the wavefunctions with LU+LLC are written by the linear expansion of the direct product basis functions as follows,

$$\Psi = c_0 |0\rangle + \sum_I \sum_k^{N_{\text{unit}} \text{ Istate}} c_k^I \hat{T}_k^I |0\rangle + \sum_I \sum_{J>I}^{N_{\text{unit}} \text{ Nunit}} \sum_k \sum_l^{I\text{state} \text{ Jstate}} c_{k,l}^{I,J} \hat{T}_k^I \hat{T}_l^J |0\rangle,$$

Assignment of the spectra was performed by using the absolute values of the expansion coefficients {c} in each excited state  $\Psi$ . If the absolute value of the expansion coefficient of the direct product basis function  $\hat{T}_m^M |0\rangle$  is largest within a certain excited state  $\Psi$ , we assigned by using the LU result of the  $m$ -th state in the  $M$ -th unit. In some cases,  $\Psi$  includes various comparable contributions from various direct product basis functions. For the fundamental transitions, we just mention the mode. For the  $\Delta v=2$  overtone transitions, we write “over”, and for

combination bands we write two vibrational modes with a hyphen. For double unit excited modes, we write vibrational modes of two units in parentheses as “2units(mode,mode)”. In many cases intensities to double units excited modes are small. But these modes have the possibility to interact with the fundamental OH motions through the inter unit coupling terms. For the clusters having second shell waters as dwat4-2,5-1, 5-3 and 5-4 , some of double units excited states, i.e. one unit is excited to IHB and one of the others is excited to the bending fundamental, emerges near the energy region where the fundamental Free OH and OH<sup>-</sup> stretching motions are observed. On the other hand, for dwat4-1 and dwat5-2, there does not exist the double-units excited state in such energy range.

Note that LU results in the following tables are not necessarily written by the energy level order.

### [dwat4-1]

TableS1: Peak positions and intensities for dwat4-1 with local monomer unit model (LU), and LU including the inter unit coupling by the lowest order linear-linear coupling terms (LU+LLC) using B3LYP/6-31+G(d,p) for PESs and DMFs.

| LU                |           |             | LU+LLC            |           |                       |
|-------------------|-----------|-------------|-------------------|-----------|-----------------------|
| Excitation Energy | Intensity | Assignments | Excitation Energy | Intensity | Assignments           |
| cm <sup>-1</sup>  | km/mol    |             | cm <sup>-1</sup>  | km/mol    |                       |
| 1643              | 134.6     | bend        | 1642              | 202.8     | bend                  |
| 1644              | 134.6     | bend        | 1643              | 200.9     | bend                  |
| 1644              | 132.6     | bend        | 1648              | 9.0       | bend                  |
| 2324              | 1965.7    | IHB OH      | 2319              | 2551.1    | IHB OH                |
| 2324              | 1979.2    | IHB OH      | 2331              | 2490.4    | IHB OH                |
| 2342              | 1950.9    | IHB OH      | 2412              | 800.1     | IHB OH                |
| 3249              | 0.5       | bend over   | 3249              | 0.4       | bend over             |
| 3249              | 0.5       | bend over   | 3250              | 0.4       | bend over             |
| 3251              | 0.5       | bend over   | 3251              | 0.4       | bend over             |
|                   |           |             | 3287              | 0.1       | 2units (bend, bend)   |
|                   |           |             | 3289              | 0.2       | 2units (bend, bend)   |
|                   |           |             | 3294              | 0.1       | 2units (bend, bend)   |
| 3687              | 2.2       | Free OH     | 3687              | 2.2       | Free OH               |
| 3687              | 2.2       | Free OH     | 3687              | 3.1       | Free OH               |
| 3687              | 2.6       | Free OH     | 3687              | 2.5       | Free OH               |
| 3695              | 0.5       | OH-         | 3695              | 0.4       | OH-                   |
| 3919              | 47.3      | bend-IHB OH | 3929              | 45.1      | bend-IHB OH           |
| 3919              | 47.4      | bend-IHB OH | 3940              | 21.9      | bend-IHB OH           |
| 3941              | 41.2      | bend-IHB OH | 3944              | 25.8      | bend-IHB OH           |
|                   |           |             | 3970              | 7.0       | 2units (bend, IHB OH) |
|                   |           |             | 3983              | 5.3       | 2units (bend, IHB OH) |
|                   |           |             | 3993              | 12.0      | 2units (bend, IHB OH) |

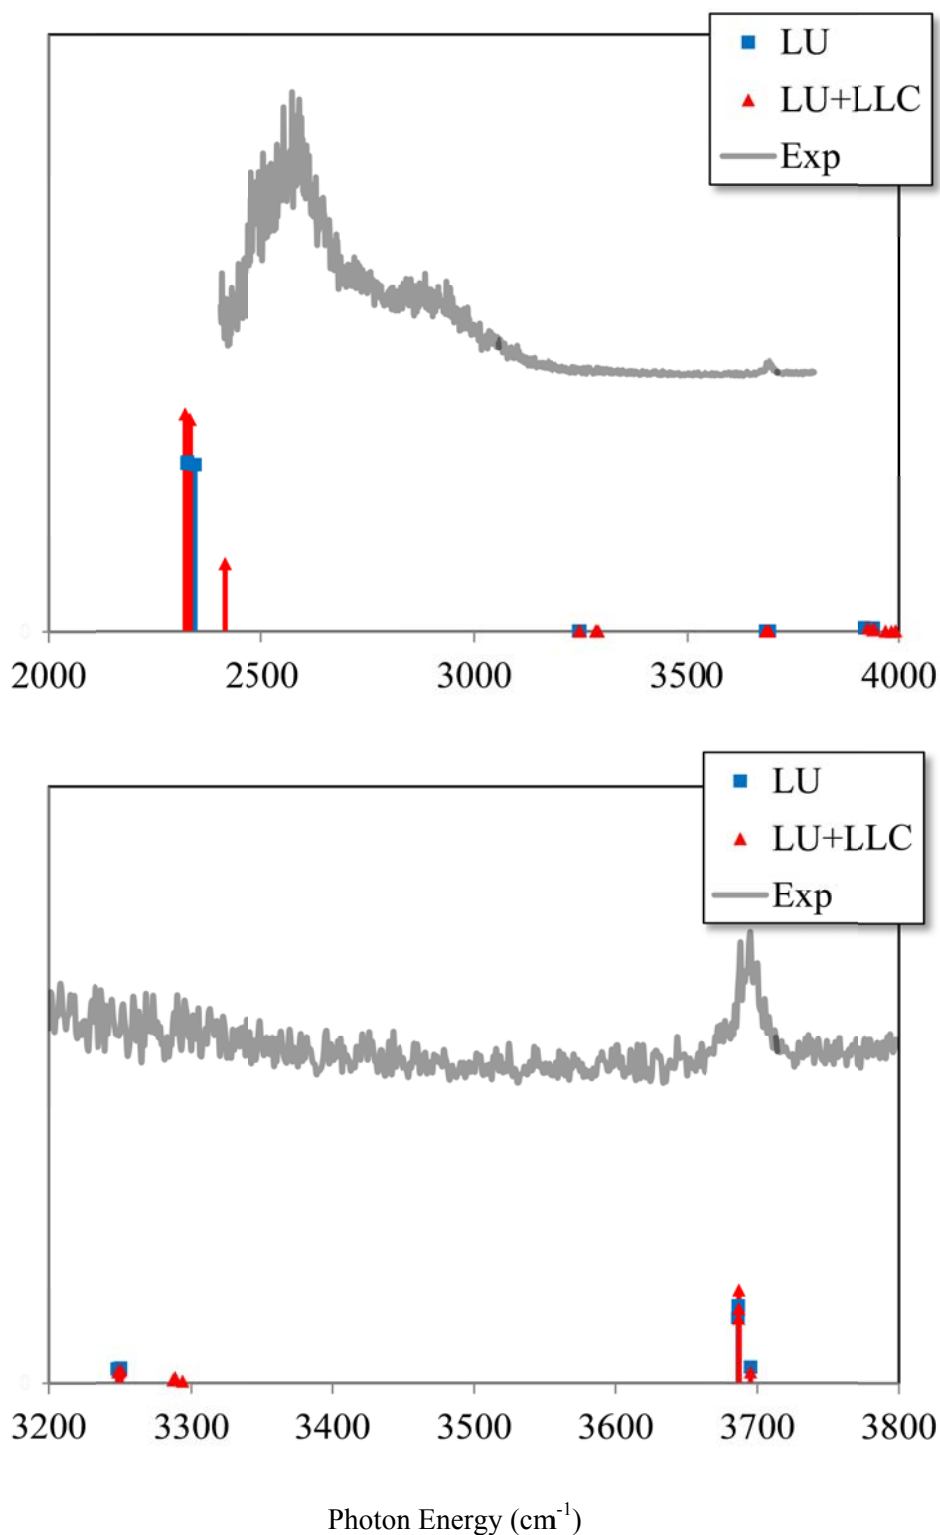

Figure S1. Line spectrum for dwat4-1 with local monomer unit model (LU), and LU including the inter unit coupling by the lowest order linear-linear coupling terms (LU+LLC) using B3LYP/6-31+G(d,p) for PESs and DMFs. Experimental spectrum is from the *Science*, 2003, **299**, 1367 by Robertson *et al.*

[dwat4-2]

TableS2: Peak positions and intensities for dwat4-2 with local monomer unit model (LU), and LU including the inter unit coupling by the lowest order linear-linear coupling terms (LU+LLC) using B3LYP/6-31+G(d,p) for PESs and DMFs.

| LU                |           |                     | LU+LLC            |           |                       |
|-------------------|-----------|---------------------|-------------------|-----------|-----------------------|
| Excitation Energy | Intensity | Assignments         | Excitation Energy | Intensity | Assignments           |
| cm <sup>-1</sup>  | km/mol    |                     | cm <sup>-1</sup>  | km/mol    |                       |
| 1502              | 2581.6    | IHB OH              | 1427              | 1894.3    | IHB OH                |
| 1503              | 2581.2    | IHB OH              | 1479              | 2528.2    | IHB OH                |
| 1626              | 28.1      | bend                | 1635              | 44.6      | bend                  |
| 1626              | 28.1      | bend                | 1649              | 64.9      | bend                  |
| 1689              | 155.4     | bend(DD water)      | 1812              | 357.0     | bend(DD water)        |
| 2929              | 254.3     | IHB OH over         | 2813              | 293.2     | IHB OH over           |
|                   |           |                     | 2933              | 2.5       | 2units (IHB OH, bend) |
| 2929              | 254.4     | IHB OH over         | 2962              | 203.1     | IHB OH over           |
| 3064              | 4.5       | IHB OH - bend       | 3036              | 5.3       | IHB OH - bend         |
| 3065              | 4.5       | IHB OH - bend       | 3101              | 14.6      | IHB OH - bend         |
|                   |           |                     | 3121              | 7.0       | 2units (IHB OH, bend) |
|                   |           |                     | 3141              | 4.7       | 2units (IHB OH, bend) |
|                   |           |                     | 3199              | 5.3       | 2units (IHB OH, bend) |
| 3227              | 3.0       | bend over           | 3234              | 3.9       | bend over             |
| 3227              | 3.0       | bend over           | 3251              | 14.0      | bend over             |
| 3294              | 230.6     | bend over(DD water) | 3281              | 209.7     | bend over(DD water)   |
|                   |           |                     | 3295              | 39.3      | 2units (bend, bend)   |
| 3366              | 482.2     | DD water OH         | 3364              | 642.6     | DD water OH           |
| 3397              | 203.4     | DD water OH         | 3375              | 480.5     | DD water OH           |
|                   |           |                     | 3433              | 0.4       | 2units (bend, bend)   |
|                   |           |                     | 3490              | 14.6      | 2units (bend, bend)   |
|                   |           |                     | 3597              | 10.4      | 2units (IHB OH, bend) |
| 3692              | 2.9       | Free OH             | 3702              | 4.6       | Free OH               |
| 3692              | 2.9       | Free OH             | 3713              | 15.9      | Free OH               |
| 3694              | 3.97      | OH-                 | 3714              | 2.8       | OH-                   |



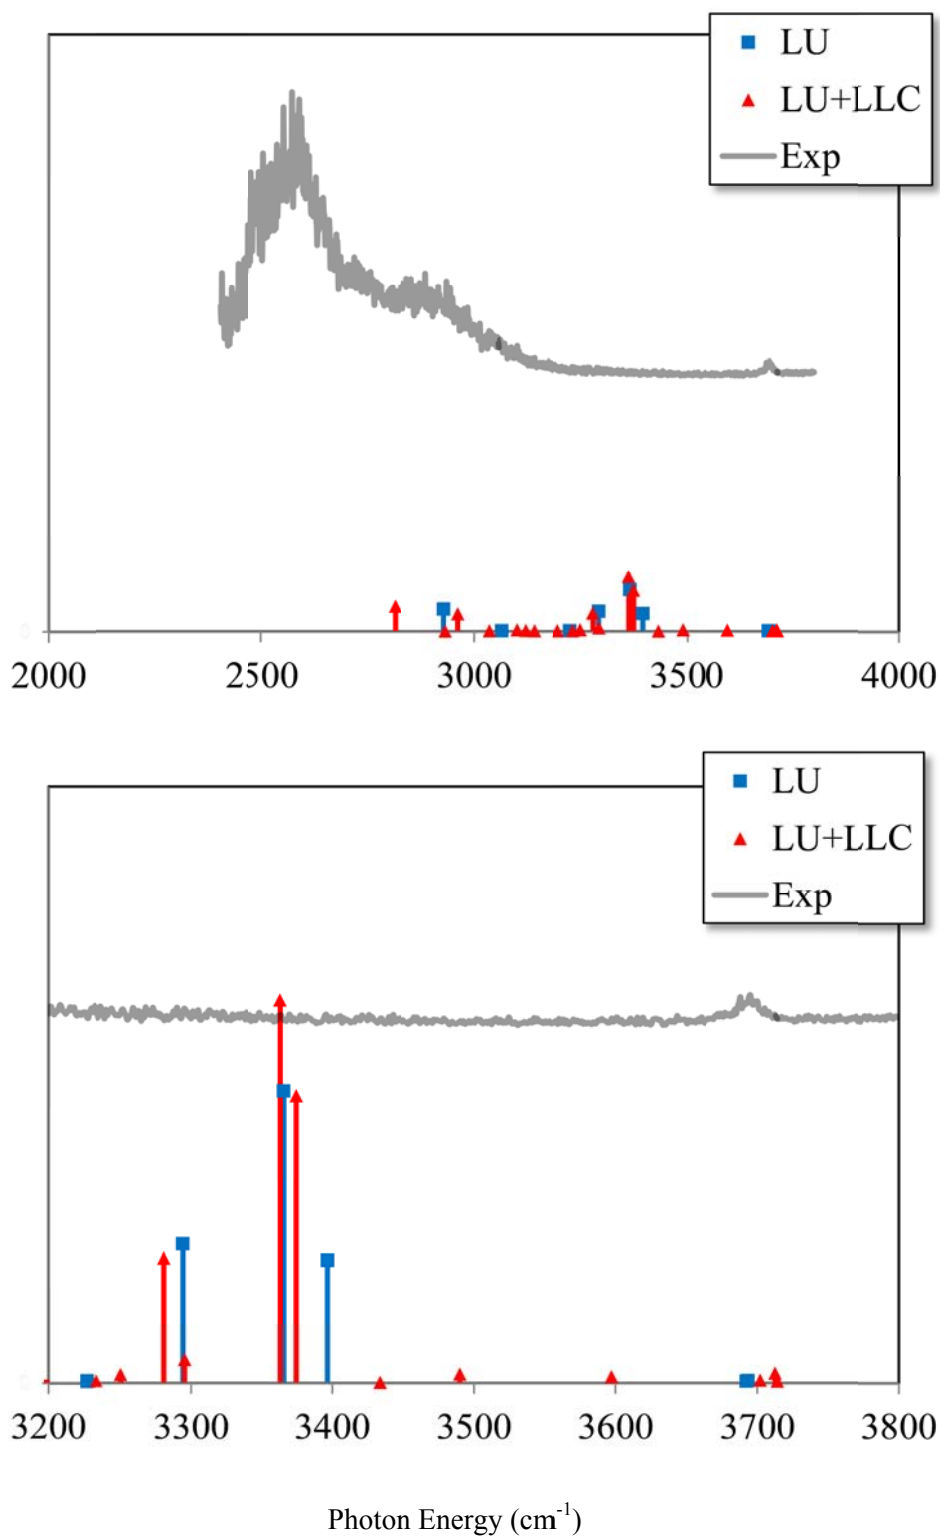

Figure S2. Line spectrum for dwat4-2 with local monomer unit model (LU), and LU including the inter unit coupling by the lowest order linear-linear coupling terms (LU+LLC) using B3LYP/6-31+G(d,p) for PESs and DMFs. Experimental spectrum is from the *Science*, 2003, **299**, 1367 by Robertson *et al.*

[dwat5-1]

TableS3: Peak positions and intensities for dwat5-1 with local monomer unit model (LU), and LU including the inter unit coupling by the lowest order linear-linear coupling terms (LU+LLC) using B3LYP/6-31+G(d,p) for PESs and DMFs.

| LU                |           |                       | LU+LLC            |           |                       |
|-------------------|-----------|-----------------------|-------------------|-----------|-----------------------|
| Excitation Energy | Intensity | Assignments           | Excitation Energy | Intensity | Assignments           |
| cm <sup>-1</sup>  | km/mol    |                       | cm <sup>-1</sup>  | km/mol    |                       |
| 1681              | 100.3     | bend (DDA water)      | 1565              | 395.0     | bend (DDA water)      |
| 1628              | 144.9     | bend                  | 1633              | 118.3     | bend                  |
| 1628              | 150.3     | bend                  | 1657              | 183.3     | bend                  |
| 1682              | 164.2     | bend (DD water)       | 1702              | 171.0     | bend (DD water)       |
| 2018              | 1852.1    | IHB OH                | 2052              | 1255.0    | IHB OH                |
| 2019              | 1850.2    | IHB OH                | 2165              | 2160.8    | IHB OH                |
| 3031              | 788.3     | IHB OH (DD water)     | 3061              | 482.3     | IHB OH (DD water)     |
| 3277              | 187.2     | bend over (DDA water) | 3084              | 148.2     | bend over (DDA water) |
| 3214              | 2.0       | bend over             | 3215              | 4.2       | bend over             |
| 3228              | 2.0       | bend over             | 3223              | 16.4      | bend over             |
|                   |           |                       | 3250              | 5.9       | 2units (bend, bend)   |
|                   |           |                       | 3271              | 15.2      | 2units (bend, bend)   |
|                   |           |                       | 3277              | 23.0      | 2units (bend, bend)   |
| 3464              | 144.9     | IHB over              | 3308              | 5.7       | IHB over              |
|                   |           |                       | 3320              | 24.8      | 2units (bend, bend)   |
|                   |           |                       | 3353              | 2.6       | 2units (bend, bend)   |
|                   |           |                       | 3365              | 27.0      | 2units (bend, bend)   |
| 3363              | 509.7     | DDA water OH          | 3387              | 286.5     | DDA water OH          |
| 3326              | 11.9      | bend over (DD water)  | 3402              | 428.5     | bend over (DD water)  |
| 3384              | 172.6     | DDA water OH          | 3413              | 482.4     | DDA water OH          |
| 3466              | 144.3     | IHB over              | 3530              | 160.5     | IHB over              |
|                   |           | Inter water OH        |                   |           | Inter water OH        |
| 3540              | 133.2     | (DD water)            | 3601              | 80.4      | (DD water)            |
| 3618              | 2.4       | IHB OH - bend         | 3654              | 0.5       | IHB OH - bend         |
| 3620              | 2.6       | IHB OH - bend         | 3687              | 6.0       | IHB OH - bend         |
| 3693              | 11.4      | Free OH               | 3709              | 12.8      | Free OH               |
| 3694              | 11.4      | Free OH               | 3729              | 2.6       | Free OH               |
| 3716              | 2.4       | OH-                   | 3741              | 2.9       | OH-                   |
|                   |           |                       | 3763              | 2.4       | 2units (bend, IHB OH) |
|                   |           |                       | 3796              | 1.0       | 2units (bend, IHB OH) |
|                   |           |                       | 3824              | 7.3       | 2units (bend, IHB OH) |
|                   |           |                       | 3833              | 7.6       | 2units (bend, IHB OH) |
|                   |           |                       | 3863              | 7.6       | 2units (bend, IHB OH) |
|                   |           |                       | 3919              | 8.4       | 2units (bend, IHB OH) |

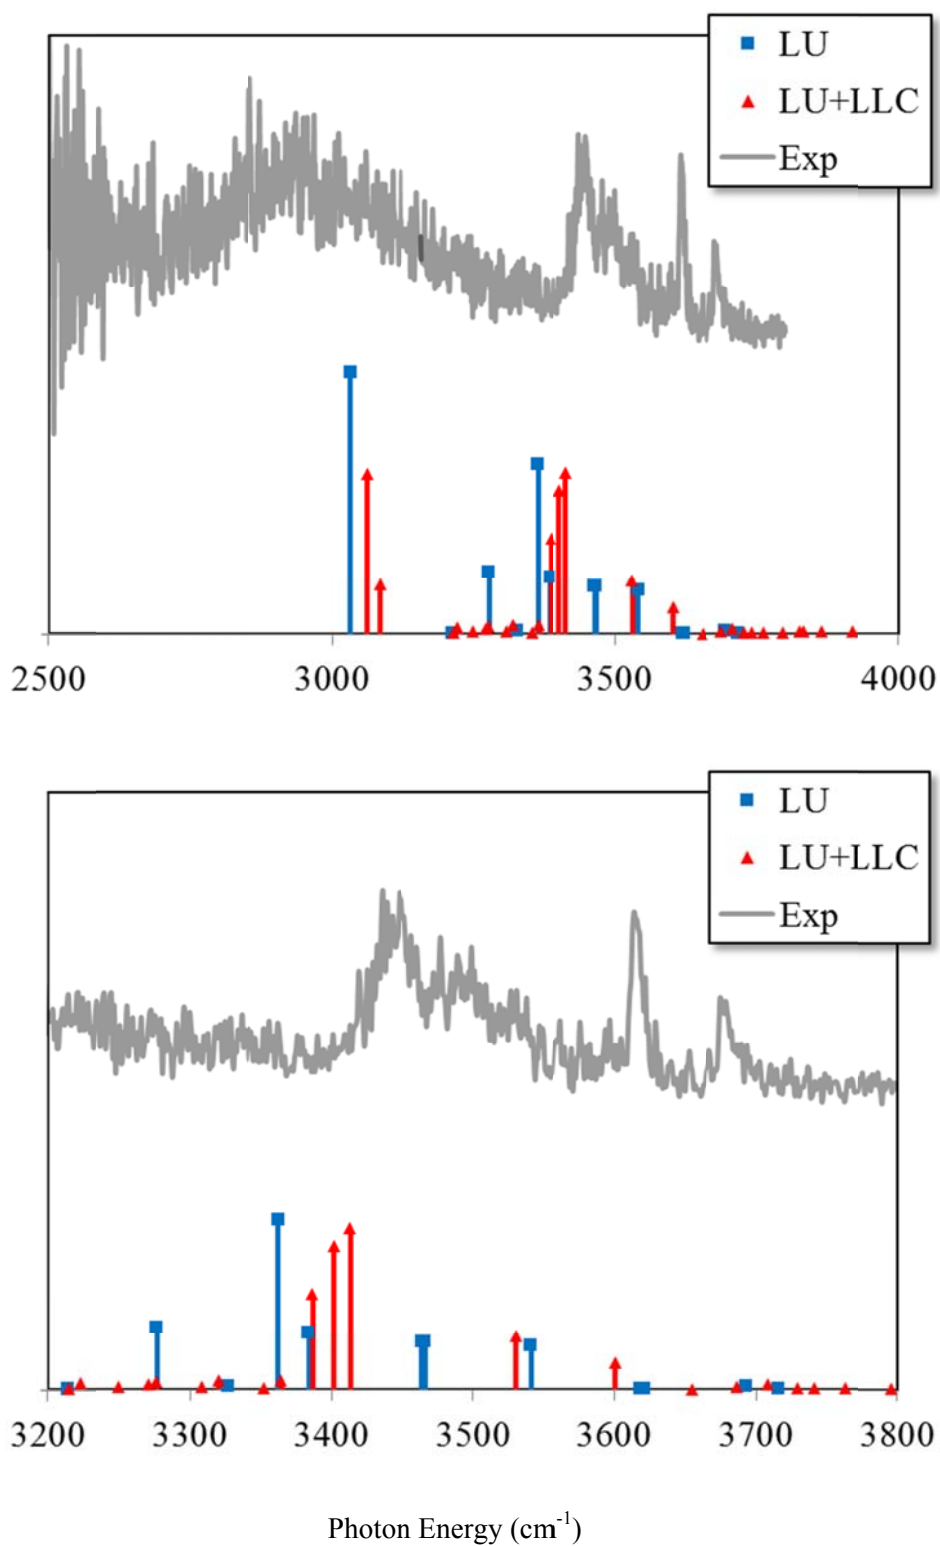

Figure S3. Line spectrum for dwat5-1 with local monomer unit model (LU), and LU including the inter unit coupling by the lowest order linear-linear coupling terms (LU+LLC) using B3LYP/6-31+G(d,p) for PESs and DMFs. Experimental spectrum is from the *Science*, 2003, **299**, 1367 by Robertson *et al.*

**[dwat5-2]**

TableS4: Peak positions and intensities for dwat5-2 with local monomer unit model (LU), and LU including the inter unit coupling by the lowest order linear-linear coupling terms (LU+LLC) using B3LYP/6-31+G(d,p) for PESs and DMFs.

| LU                |           |             | LU+LLC            |           |                     |
|-------------------|-----------|-------------|-------------------|-----------|---------------------|
| Excitation Energy | Intensity | Assignments | Excitation Energy | Intensity | Assignments         |
| cm <sup>-1</sup>  | km/mol    |             | cm <sup>-1</sup>  | km/mol    |                     |
| 1658              | 168.2     | bend        | 1654              | 10.1      | bend                |
| 1658              | 168.2     | bend        | 1655              | 293.9     | bend                |
| 1658              | 168.2     | bend        | 1656              | 305.1     | bend                |
| 1658              | 168.2     | bend        | 1667              | 64.4      | bend                |
| 2863              | 1058.3    | IHB OH      | 2855              | 1543.9    | IHB OH              |
| 2862              | 1058.6    | IHB OH      | 2856              | 1534.8    | IHB OH              |
| 2863              | 1058.2    | IHB OH      | 2865              | 8.4       | IHB OH              |
| 2862              | 1058.6    | IHB OH      | 2918              | 1097.1    | IHB OH              |
| 3281              | 3.6       | bend over   | 3279              | 5.6       | bend over           |
| 3281              | 3.6       | bend over   | 3279              | 4.4       | bend over           |
| 3281              | 3.6       | bend over   | 3280              | 4.2       | bend over           |
| 3281              | 3.6       | bend over   | 3281              | 1.9       | bend over           |
|                   |           |             | 3309              | 0.1       | 2units (bend, bend) |
|                   |           |             | 3311              | 0.0       | 2units (bend, bend) |
|                   |           |             | 3316              | 0.1       | 2units (bend, bend) |
|                   |           |             | 3317              | 0.2       | 2units (bend, bend) |
|                   |           |             | 3318              | 0.2       | 2units (bend, bend) |
|                   |           |             | 3331              | 0.5       | 2units (bend, bend) |
| 3651              | 25.0      | Free OH     | 3648              | 31.4      | Free OH             |
| 3651              | 25.0      | Free OH     | 3650              | 41.9      | Free OH             |
| 3651              | 25.0      | Free OH     | 3651              | 41.2      | Free OH             |
| 3651              | 25.0      | Free OH     | 3652              | 0.4       | Free OH             |
| 3711              | 0.3       | OH-         | 3708              | 1.0       | OH-                 |

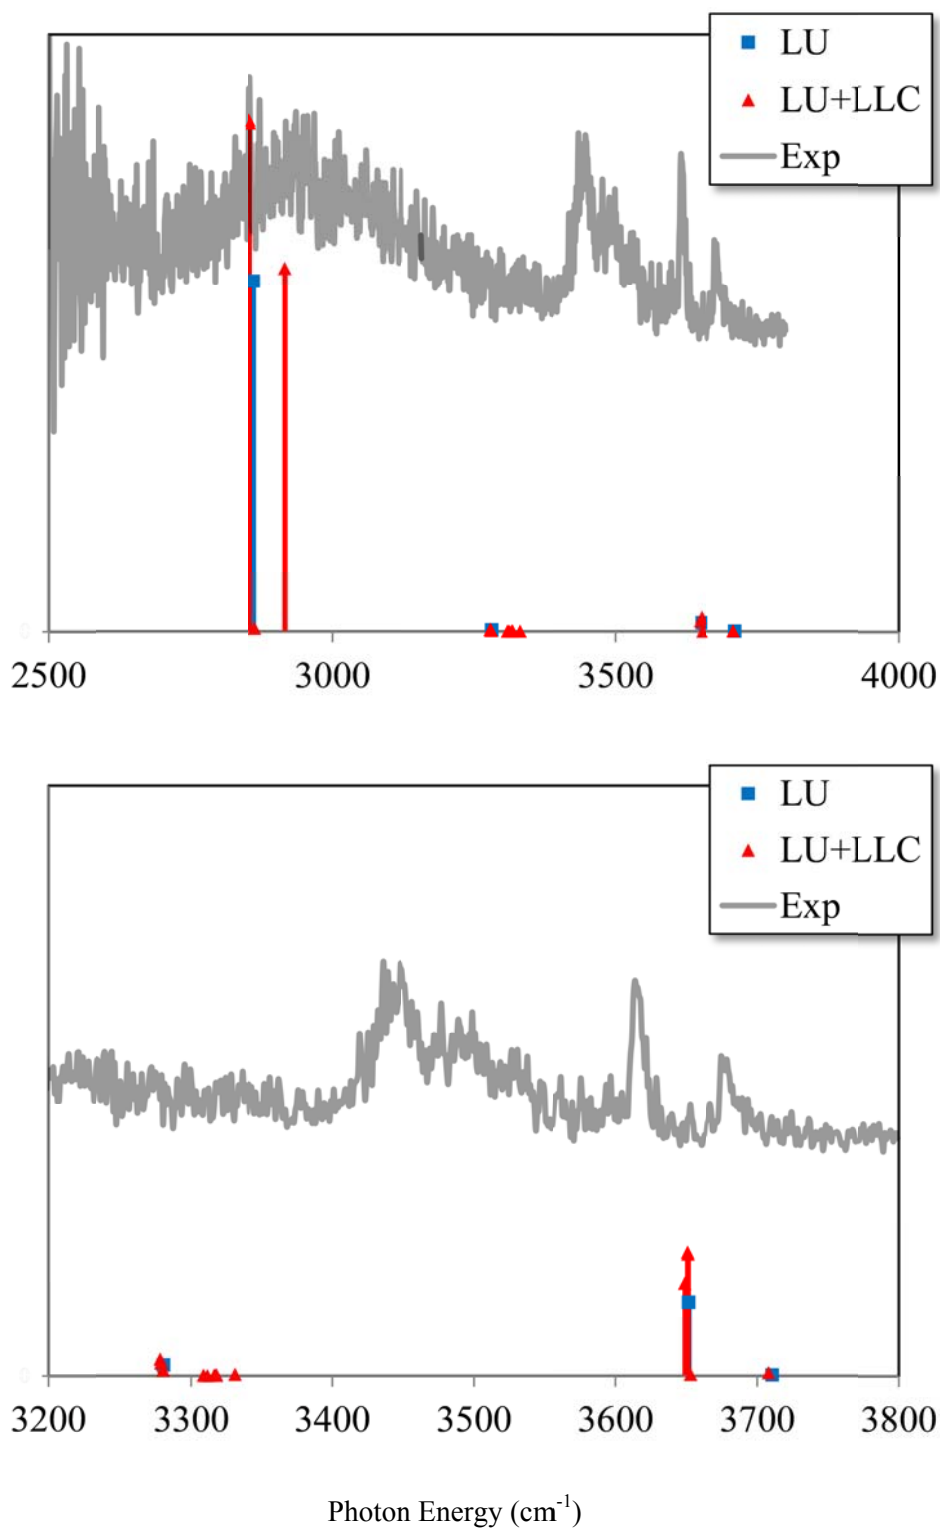

Figure S4. Line spectrum for dwat5-2 with local monomer unit model (LU), and LU including the inter unit coupling by the lowest order linear-linear coupling terms (LU+LLC) using B3LYP/6-31+G(d,p) for PESs and DMFs. Experimental spectrum is from the *Science*, 2003, **299**, 1367 by Robertson *et al.*

**[dwat5-3]**

TableS5: Peak positions and intensities for dwat5-3 with local monomer unit model (LU), and LU including the inter unit coupling by the lowest order linear-linear coupling terms (LU+LLC) using B3LYP/6-31+G(d,p) for PESs and DMFs.

| LU                |           |                      | LU+LLC            |           |                       |
|-------------------|-----------|----------------------|-------------------|-----------|-----------------------|
| Excitation Energy | Intensity | Assignments          | Excitation Energy | Intensity | Assignments           |
| cm <sup>-1</sup>  | km/mol    |                      | cm <sup>-1</sup>  | km/mol    |                       |
| 1683              | 170.6     | bend(DD water)       | 1619              | 669.8     | bend (DD water)       |
| 1629              | 110.8     | bend                 | 1643              | 90.7      | bend                  |
| 1647              | 71.1      | bend                 | 1649              | 83.2      | bend                  |
| 1650              | 75.9      | bend                 | 1672              | 55.1      | bend                  |
| 2104              | 2071.0    | IHB OH               | 2135              | 1947.5    | IHB OH                |
| 2163              | 2093.8    | IHB OH               | 2246              | 1714.2    | IHB OH                |
| 2439              | 1944.7    | IHB OH               | 2485              | 1651.7    | IHB OH                |
| 3300              | 124.2     | bend over (DD water) | 3164              | 31.3      | bend over (DD water)  |
| 3221              | 1.2       | bend over            | 3234              | 1.1       | bend over             |
| 3257              | 0.6       | bend over            | 3257              | 0.8       | bend over             |
| 3263              | 0.6       | bend over            | 3276              | 3.6       | bend over             |
|                   |           |                      | 3285              | 0.3       | 2units (bend, bend)   |
|                   |           |                      | 3296              | 1.5       | 2units (bend, bend)   |
|                   |           |                      | 3309              | 0.1       | 2units (bend, bend)   |
|                   |           |                      | 3319              | 7.4       | 2units (bend, bend)   |
|                   |           |                      | 3322              | 3.7       | 2units (bend, bend)   |
|                   |           |                      | 3333              | 50.3      | 2units (bend, bend)   |
| 3404              | 378.7     | DD water OH          | 3411              | 430.5     | DD water OH           |
| 3418              | 322.9     | DD water OH          | 3416              | 507.5     | DD water OH           |
| 3641              | 111.5     | IHB OH over          | 3604              | 182.9     | IHB OH over           |
| 3768              | 124.9     | IHB OH over          | 3695              | 90.1      | IHB OH over           |
| 3690              | 2.6       | Free OH              | 3703              | 19.4      | Free OH               |
| 3691              | 4.2       | Free OH              | 3705              | 4.2       | Free OH               |
| 3696              | 0.1       | OH-                  | 3709              | 0.8       | OH-                   |
| 3691              | 25.4      | bend - IHB OH        | 3723              | 132.1     | bend - IHB OH         |
| 3800              | 0.9       | bend - IHB OH        | 3780              | 2.8       | bend - IHB OH         |
|                   |           |                      | 3801              | 5.0       | 2units (bend, IHB OH) |
| 3751              | 5.3       | Free OH              | 3817              | 5.8       | Free OH               |
|                   |           |                      | 3849              | 2.6       | 2units (bend, IHB OH) |
|                   |           |                      | 3898              | 3.7       | 2units (bend, IHB OH) |
|                   |           |                      | 3914              | 1.6       | 2units (bend, IHB OH) |
|                   |           |                      | 3937              | 4.7       | 2units (bend, IHB OH) |
|                   |           |                      | 3982              | 15.7      | 2units (bend, IHB OH) |

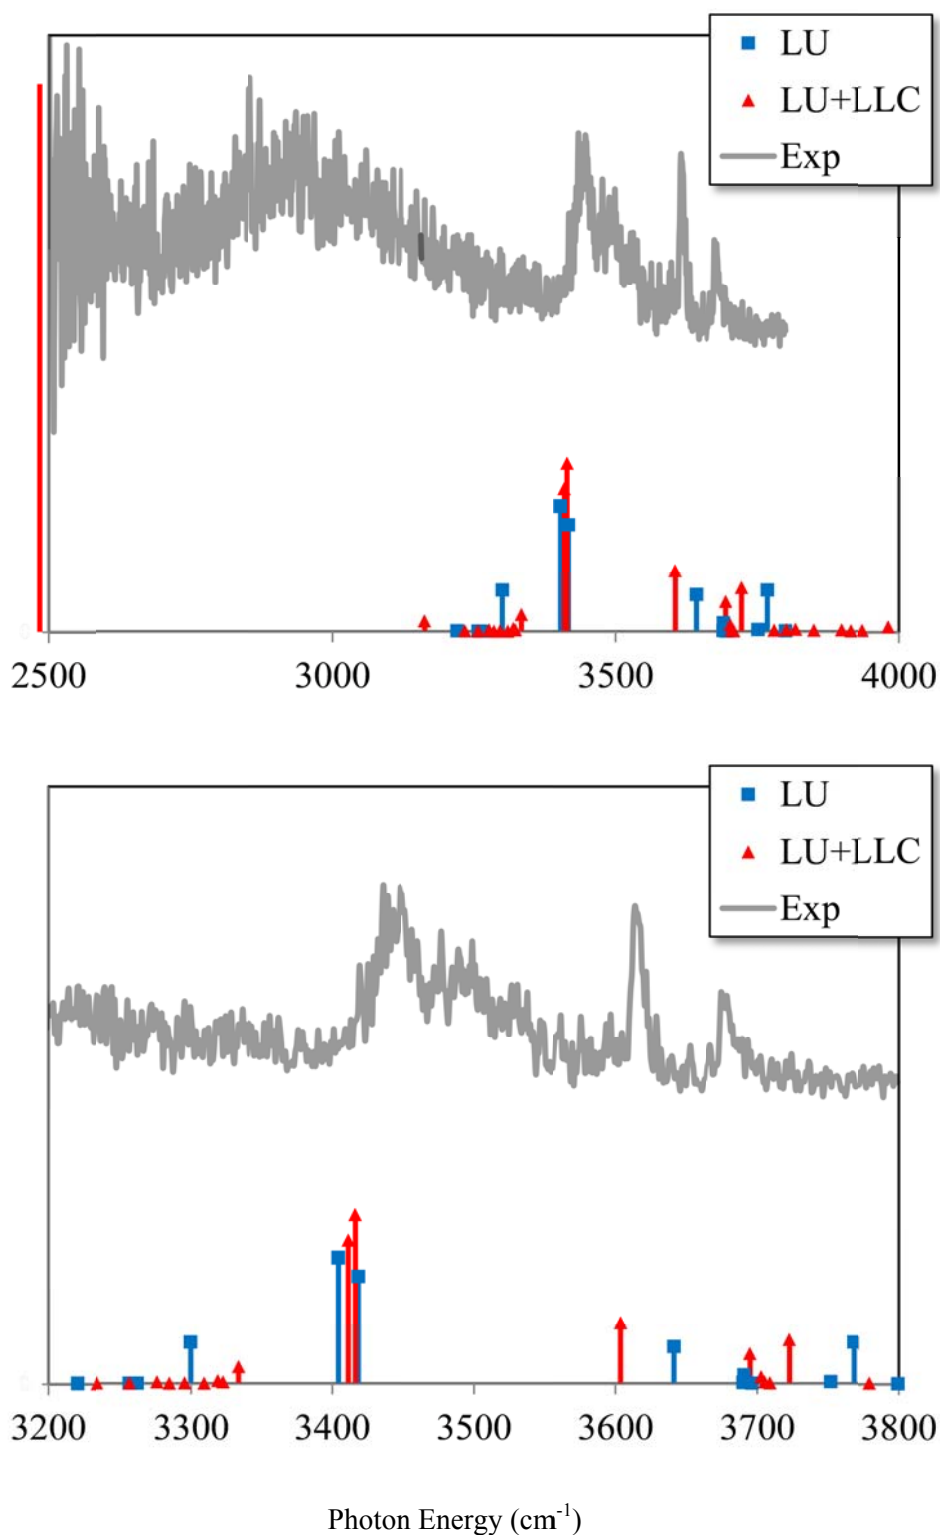

Figure S5. Line spectrum for dwat5-3 with local monomer unit model (LU), and LU including the inter unit coupling by the lowest order linear-linear coupling terms (LU+LLC) using B3LYP/6-31+G(d,p) for PESs and DMFs. Experimental spectrum is from the *Science*, 2003, **299**, 1367 by Robertson *et al.*

**[dwat5-4]**

TableS6: Peak positions and intensities for dwat5-4 with local monomer unit model (LU), and LU including the inter unit coupling by the lowest order linear-linear coupling terms (LU+LLC) using B3LYP/6-31+G(d,p) for PESs and DMFs.

| LU                |           |                     | LU+LLC            |           |                       |
|-------------------|-----------|---------------------|-------------------|-----------|-----------------------|
| Excitation Energy | Intensity | Assignments         | Excitation Energy | Intensity | Assignments           |
| cm <sup>-1</sup>  | km/mol    |                     | cm <sup>-1</sup>  | km/mol    |                       |
| 1686              | 155.8     | bend (DD water)     | 1632              | 431.3     | bend (DD water)       |
| 1635              | 79.9      | bend                | 1641              | 74.0      | bend                  |
| 1635              | 79.9      | bend                | 1660              | 334.6     | bend                  |
| 1662              | 110.7     | bend                | 1679              | 37.9      | bend                  |
| 2111              | 2054.1    | IHB OH              | 2137              | 2072.8    | IHB OH                |
| 2111              | 2054.0    | IHB OH              | 2250              | 1388.3    | IHB OH                |
| 2498              | 1782.4    | IHB OH              | 2544              | 1576.5    | IHB OH                |
| 3303              | 128.3     | bend over(DD water) | 3228              | 42.3      | bend over(DD water)   |
| 3234              | 0.6       | bend over           | 3233              | 0.6       | bend over             |
| 3234              | 0.6       | bend over           | 3245              | 0.8       | bend over             |
|                   |           |                     | 3291              | 0.6       | 2units (bend, bend)   |
|                   |           |                     | 3300              | 0.7       | 2units (bend, bend)   |
| 3286              | 1.9       | bend over           | 3302              | 1.8       | bend over             |
|                   |           |                     | 3312              | 0.7       | 2units (bend, bend)   |
|                   |           |                     | 3313              | 0.1       | 2units (bend, bend)   |
|                   |           |                     | 3319              | 4.4       | 2units (bend, bend)   |
|                   |           |                     | 3338              | 1.4       | 2units (bend, bend)   |
| 3414              | 428.5     | DD water OH         | 3430              | 490.4     | DD water OH           |
| 3418              | 260.9     | DD water OH         | 3437              | 575.7     | DD water OH           |
| 3657              | 82.8      | IHB OH over         | 3693              | 27.8      | IHB OH over           |
| 3657              | 82.7      | IHB OH over         | 3702              | 11.4      | IHB OH over           |
| 3691              | 5.0       | Free OH             | 3707              | 5.8       | Free OH               |
| 3704              | 0.0       | OH-                 | 3719              | 0.1       | OH-                   |
| 3693              | 48.9      | bend - IHB OH       | 3724              | 44.8      | bend - IHB OH         |
| 3693              | 49.1      | bend - IHB OH       | 3751              | 111.0     | bend - IHB OH         |
| 3737              | 6.7       | Free OH             | 3777              | 35.9      | Free OH               |
| 3737              | 6.7       | Free OH             | 3787              | 30.2      | Free OH               |
|                   |           |                     | 3797              | 35.2      | 2units (bend, IHB OH) |
|                   |           |                     | 3834              | 7.1       | 2units (bend, IHB OH) |
|                   |           |                     | 3865              | 9.0       | 2units (bend, IHB OH) |
|                   |           |                     | 3876              | 10.1      | 2units (bend, IHB OH) |
|                   |           |                     | 3885              | 14.5      | 2units (bend, IHB OH) |
|                   |           |                     | 3949              | 1.4       | 2units (bend, IHB OH) |



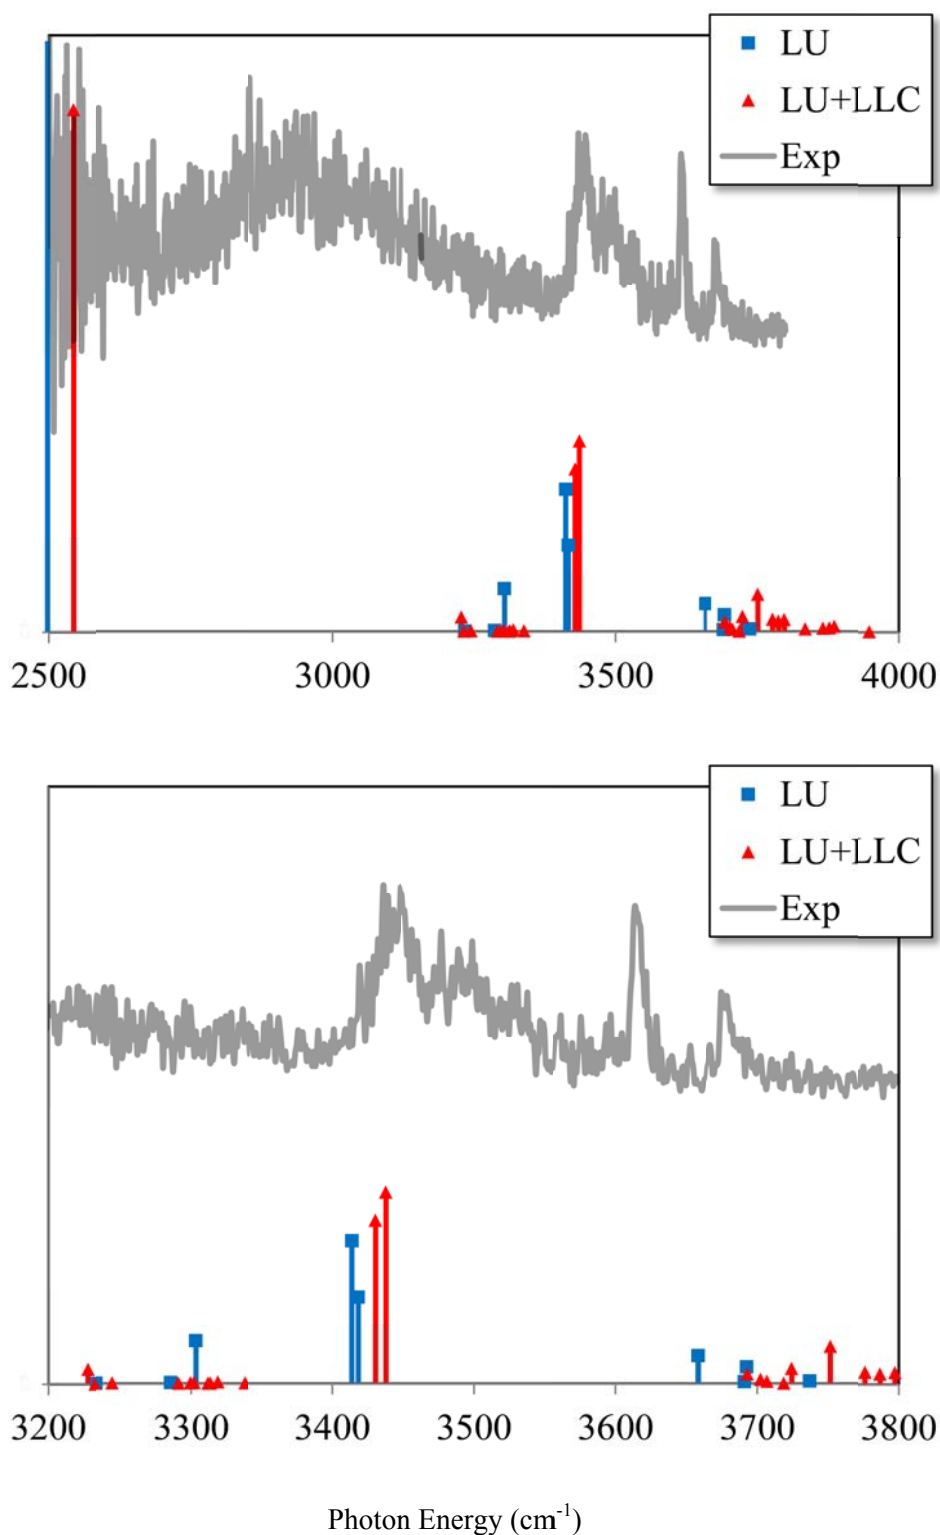

Figure S6. Line spectrum for dwat5-4 with local monomer unit model (LU), and LU including the inter unit coupling by the lowest order linear-linear coupling terms (LU+LLC) using B3LYP/6-31+G(d,p) for PESs and DMFs. Experimental spectrum is from the *Science*, 2003, **299**, 1367 by Robertson *et al.*

# Optimized Geometry

## B3LYP/6-31+G(d,p)

### [dwat4-1]

|   |           |           |           |
|---|-----------|-----------|-----------|
| O | 0.530529  | 2.095628  | 1.028272  |
| O | 1.936973  | -1.268376 | -1.136469 |
| O | -2.216966 | -0.671602 | -0.464436 |
| O | 0.042157  | 0.540975  | -1.026698 |
| H | 0.300980  | 1.531844  | 0.210845  |
| H | 1.363144  | 1.712563  | 1.328329  |
| H | 1.239415  | -0.525528 | -1.116142 |
| H | 1.409590  | -2.063922 | -0.998630 |
| H | -1.344826 | -0.223408 | -0.740024 |
| H | -2.417580 | -0.251754 | 0.380324  |
| H | -0.017874 | 1.042324  | -1.849143 |

### [dwat4-2]

|   |           |           |           |
|---|-----------|-----------|-----------|
| O | 0.942858  | 2.024750  | 0.879957  |
| O | 2.057071  | -1.092947 | -1.177622 |
| O | 0.096194  | 0.489190  | -0.944230 |
| O | 3.392750  | 0.459170  | 0.886443  |
| H | 0.568458  | 1.432149  | 0.093428  |
| H | 0.401367  | 1.785225  | 1.640838  |
| H | 1.235596  | -0.434481 | -1.138489 |
| H | 1.724140  | -1.916005 | -0.801778 |
| H | -0.133682 | 0.946717  | -1.761944 |
| H | 3.085621  | -0.130513 | 0.166823  |
| H | 2.648968  | 1.091010  | 0.972959  |

**[dwat5-1]**

|   |           |           |           |
|---|-----------|-----------|-----------|
| O | 2.019635  | 0.109131  | -0.826800 |
| O | -2.021731 | 0.108080  | -0.822845 |
| O | 0.003395  | -0.544670 | 2.049977  |
| O | -0.000639 | 1.941966  | 0.152978  |
| O | -0.000484 | -1.447376 | -0.540210 |
| H | 1.251164  | -0.576503 | -0.801170 |
| H | 2.511782  | -0.069936 | -0.016146 |
| H | -1.252901 | -0.577299 | -0.798440 |
| H | -2.513060 | -0.071617 | -0.011842 |
| H | 0.002080  | -1.052332 | 1.197811  |
| H | 0.002225  | 0.376605  | 1.739053  |
| H | -0.769365 | 1.483076  | -0.245814 |
| H | 0.767346  | 1.483587  | -0.247812 |
| H | -0.000684 | -2.332629 | -0.920443 |

**[dwat5-2]**

|   |           |           |           |
|---|-----------|-----------|-----------|
| O | -1.174442 | 1.470520  | 1.361076  |
| O | 1.800356  | 1.467173  | 0.042425  |
| O | 0.348759  | -0.689395 | 0.788122  |
| O | -2.000680 | -1.069887 | -0.496150 |
| O | 0.974119  | -1.073260 | -1.814804 |
| H | -0.656079 | 0.619807  | 1.299070  |
| H | -0.562833 | 2.097693  | 0.950538  |
| H | 1.359638  | 0.670880  | 0.452213  |
| H | 1.836363  | 1.207847  | -0.888924 |
| H | 0.653284  | -1.291795 | 1.476644  |

|   |           |           |           |
|---|-----------|-----------|-----------|
| H | 0.866931  | -1.035905 | -0.823152 |
| H | -2.347250 | -0.196198 | -0.266988 |
| H | -1.148793 | -1.086958 | 0.023691  |
| H | 0.051838  | -1.085870 | -2.106681 |

**[dwat5-3]**

|   |           |           |           |
|---|-----------|-----------|-----------|
| O | 0.050309  | 1.157104  | 0.277837  |
| O | 0.347129  | -0.022460 | -2.009459 |
| O | 2.310806  | 1.740253  | 1.507500  |
| O | -1.309336 | -0.745785 | 1.398382  |
| O | -1.402895 | -2.189792 | -1.123165 |
| H | -0.800828 | 0.041511  | 0.981676  |
| H | 1.419277  | 1.517529  | 1.077167  |
| H | -0.695273 | -1.113126 | 2.044630  |
| H | -0.858741 | -1.516756 | -1.578143 |
| H | -0.478324 | 1.961477  | 0.204483  |
| H | 2.905000  | 1.856899  | 0.757514  |
| H | 1.245079  | -0.370901 | -1.964778 |
| H | 0.222448  | 0.490521  | -1.127901 |
| H | -1.480870 | -1.822593 | -0.219573 |

**[dwat5-4]**

|   |           |           |           |
|---|-----------|-----------|-----------|
| O | 0.917217  | -0.053958 | 1.293159  |
| O | -0.468727 | 1.927890  | 0.380564  |
| O | 3.220933  | -0.116940 | -0.006100 |
| O | -0.573317 | -1.959924 | 0.383708  |
| O | -2.131352 | 0.026122  | -1.079335 |
| H | 0.017455  | -1.230301 | 0.800906  |

|   |           |           |           |
|---|-----------|-----------|-----------|
| H | 2.373967  | -0.093725 | 0.548703  |
| H | 0.031685  | -2.481494 | -0.156102 |
| H | -1.675443 | 0.778170  | -0.651493 |
| H | 1.009275  | -0.055658 | 2.253498  |
| H | 2.900988  | -0.109041 | -0.915594 |
| H | 0.163437  | 2.415370  | -0.159982 |
| H | 0.081987  | 1.168231  | 0.798967  |
| H | -1.716521 | -0.748639 | -0.650222 |

**[dwat5-5]**

|   |           |           |           |
|---|-----------|-----------|-----------|
| O | -1.418431 | 0.442447  | -0.331340 |
| O | 2.517314  | 1.657431  | 0.489816  |
| O | 0.878194  | -0.416302 | 0.292936  |
| O | -3.577931 | -0.258251 | 1.178005  |
| H | 1.901402  | -1.744638 | -1.755805 |
| H | -0.484133 | 0.047078  | -0.059529 |
| H | -1.277895 | 1.396452  | -0.347038 |
| H | 1.869928  | 0.881814  | 0.474131  |
| H | 3.126980  | 1.447368  | -0.227389 |
| H | 1.547822  | -1.257998 | -0.942587 |
| H | 0.876268  | -0.953561 | 1.094456  |
| H | -3.147674 | -0.511836 | 2.002541  |
| H | -2.820753 | -0.014159 | 0.581798  |
| H | 1.145529  | -1.755106 | -2.354480 |

**[dwat5-6]**

|   |           |           |          |
|---|-----------|-----------|----------|
| O | 1.695362  | -1.468344 | 0.119296 |
| O | -1.953097 | -1.424920 | 0.289486 |

|   |           |           |           |
|---|-----------|-----------|-----------|
| O | -0.039471 | 0.041284  | 1.424099  |
| O | 2.398606  | 1.360077  | 1.443311  |
| O | -2.016059 | 1.685948  | 0.370315  |
| H | 1.029197  | -0.952095 | 0.680449  |
| H | 1.674761  | -1.017340 | -0.733253 |
| H | -1.236221 | -0.894608 | 0.763283  |
| H | -1.456830 | -2.077241 | -0.218931 |
| H | -0.125267 | -0.111548 | 2.374108  |
| H | -1.231127 | 1.275837  | 0.813124  |
| H | 2.850688  | 0.552205  | 1.163807  |
| H | 1.451682  | 1.061038  | 1.449560  |
| H | -2.467313 | 0.902777  | 0.023871  |

**[dwat5-7]**

|   |           |           |           |
|---|-----------|-----------|-----------|
| O | -0.047626 | 0.293142  | -0.525076 |
| O | -1.800310 | -1.446995 | -0.121249 |
| O | 3.676895  | 1.660672  | 1.401762  |
| O | 2.431072  | 0.036356  | -0.379521 |
| O | -4.340373 | -0.503516 | -0.283977 |
| H | 1.367150  | 0.142961  | -0.421658 |
| H | -1.057885 | -0.704662 | -0.303933 |
| H | -1.530355 | -1.873718 | 0.699531  |
| H | -3.426415 | -0.886415 | -0.181755 |
| H | 2.993174  | 1.752613  | 2.075100  |
| H | -0.331923 | 1.160795  | -0.214118 |
| H | 3.259028  | 1.067920  | 0.718198  |
| H | 2.724590  | 0.101615  | -1.295081 |

|   |           |          |           |
|---|-----------|----------|-----------|
| H | -4.221844 | 0.196792 | -0.935863 |
|---|-----------|----------|-----------|

### MP2/6-311++G(3df,3pd)

#### **[dwat4-1]**

|   |           |           |           |
|---|-----------|-----------|-----------|
| O | 1.139240  | 2.062688  | -0.265642 |
| O | -2.345603 | -0.043530 | -0.286152 |
| O | 1.218649  | -2.007995 | -0.267798 |
| O | -0.001916 | 0.003707  | 0.865981  |
| H | 0.737335  | 1.277330  | 0.224707  |
| H | 0.400448  | 2.353961  | -0.801809 |
| H | -1.468928 | 0.003712  | 0.211774  |
| H | -2.223217 | -0.831178 | -0.817910 |
| H | 0.736007  | -1.269883 | 0.223127  |
| H | 1.844498  | -1.511000 | -0.796418 |
| H | -0.007172 | 0.003130  | 1.824858  |

#### **[dwat4-2]**

|   |           |           |           |
|---|-----------|-----------|-----------|
| O | -1.965074 | -0.545943 | 0.015359  |
| O | 1.993541  | -0.132215 | 0.045395  |
| O | 0.151848  | -1.708411 | 0.755042  |
| O | -0.174460 | 1.535642  | -0.924076 |
| H | -1.111730 | -1.071320 | 0.302454  |
| H | -2.333857 | -0.263999 | 0.853440  |
| H | 1.263053  | -0.823128 | 0.320473  |
| H | 2.283443  | 0.218567  | 0.888473  |
| H | 0.246017  | -2.581420 | 0.368970  |

|   |          |          |           |
|---|----------|----------|-----------|
| H | 0.629779 | 1.058800 | -0.658250 |
|---|----------|----------|-----------|

|   |           |          |           |
|---|-----------|----------|-----------|
| H | -0.866628 | 0.902404 | -0.669604 |
|---|-----------|----------|-----------|

**[dwat5-1]**

|   |          |          |           |
|---|----------|----------|-----------|
| O | 2.073427 | 0.132680 | -0.694408 |
|---|----------|----------|-----------|

|   |           |          |           |
|---|-----------|----------|-----------|
| O | -2.075439 | 0.131421 | -0.690108 |
|---|-----------|----------|-----------|

|   |          |           |          |
|---|----------|-----------|----------|
| O | 0.002446 | -0.459113 | 1.974883 |
|---|----------|-----------|----------|

|   |           |          |          |
|---|-----------|----------|----------|
| O | -0.000799 | 1.989075 | 0.096698 |
|---|-----------|----------|----------|

|   |           |           |           |
|---|-----------|-----------|-----------|
| O | -0.000469 | -1.369599 | -0.574628 |
|---|-----------|-----------|-----------|

|   |          |           |           |
|---|----------|-----------|-----------|
| H | 1.295661 | -0.523795 | -0.731749 |
|---|----------|-----------|-----------|

|   |          |           |          |
|---|----------|-----------|----------|
| H | 2.405276 | -0.007748 | 0.195105 |
|---|----------|-----------|----------|

|   |           |           |           |
|---|-----------|-----------|-----------|
| H | -1.297356 | -0.524622 | -0.728987 |
|---|-----------|-----------|-----------|

|   |           |           |          |
|---|-----------|-----------|----------|
| H | -2.405648 | -0.009359 | 0.199957 |
|---|-----------|-----------|----------|

|   |          |           |          |
|---|----------|-----------|----------|
| H | 0.001483 | -0.953318 | 1.120850 |
|---|----------|-----------|----------|

|   |          |          |          |
|---|----------|----------|----------|
| H | 0.001614 | 0.453609 | 1.661112 |
|---|----------|----------|----------|

|   |           |          |           |
|---|-----------|----------|-----------|
| H | -0.758978 | 1.489848 | -0.252406 |
|---|-----------|----------|-----------|

|   |          |          |           |
|---|----------|----------|-----------|
| H | 0.756937 | 1.490355 | -0.254079 |
|---|----------|----------|-----------|

|   |           |           |           |
|---|-----------|-----------|-----------|
| H | -0.000601 | -2.249840 | -0.952860 |
|---|-----------|-----------|-----------|

**[dwat5-2]**

|   |          |           |           |
|---|----------|-----------|-----------|
| O | 1.440048 | -1.677562 | -0.326995 |
|---|----------|-----------|-----------|

|   |           |           |           |
|---|-----------|-----------|-----------|
| O | -1.677621 | -1.440016 | -0.326975 |
|---|-----------|-----------|-----------|

|   |           |           |          |
|---|-----------|-----------|----------|
| O | -0.000001 | -0.000009 | 1.206819 |
|---|-----------|-----------|----------|

|   |          |          |           |
|---|----------|----------|-----------|
| O | 1.677609 | 1.440044 | -0.326945 |
|---|----------|----------|-----------|

|   |           |          |           |
|---|-----------|----------|-----------|
| O | -1.440016 | 1.677583 | -0.326990 |
|---|-----------|----------|-----------|

|   |          |           |          |
|---|----------|-----------|----------|
| H | 1.019491 | -1.107527 | 0.365001 |
|---|----------|-----------|----------|

|   |          |           |           |
|---|----------|-----------|-----------|
| H | 0.653240 | -1.968295 | -0.798319 |
|---|----------|-----------|-----------|

|   |           |           |          |
|---|-----------|-----------|----------|
| H | -1.107553 | -1.019481 | 0.365007 |
|---|-----------|-----------|----------|



|   |           |           |           |
|---|-----------|-----------|-----------|
| H | -1.968351 | -0.653194 | -0.798280 |
| H | -0.000007 | -0.000017 | 2.165637  |
| H | -1.019475 | 1.107529  | 0.365000  |
| H | 1.968280  | 0.653242  | -0.798320 |
| H | 1.107553  | 1.019483  | 0.365033  |
| H | -0.653205 | 1.968215  | -0.798374 |

**[dwat5-3]**

|   |           |           |           |
|---|-----------|-----------|-----------|
| O | 0.854492  | -0.234157 | 0.798459  |
| O | -0.382734 | 1.891374  | 0.005420  |
| O | 2.990372  | 0.269032  | -0.651835 |
| O | -0.891095 | -2.025407 | 0.176591  |
| O | -2.716718 | 0.160832  | -0.389238 |
| H | -0.185194 | -1.347076 | 0.457669  |
| H | 2.197150  | 0.025912  | -0.084187 |
| H | -0.531333 | -2.388593 | -0.633743 |
| H | -2.042468 | 0.842544  | -0.242982 |
| H | 1.078089  | -0.266565 | 1.730833  |
| H | 3.015545  | 1.222996  | -0.569384 |
| H | -0.049398 | 1.942724  | -0.892064 |
| H | 0.106725  | 1.083020  | 0.379353  |
| H | -2.212858 | -0.650460 | -0.213612 |

**[dwat5-5]**

|   |           |           |           |
|---|-----------|-----------|-----------|
| O | -1.563517 | 0.251323  | -0.470513 |
| O | 2.512683  | 1.387685  | 0.274809  |
| O | 0.673207  | -0.553026 | 0.370739  |
| O | -3.510290 | -0.093153 | 1.404383  |

|   |           |           |           |
|---|-----------|-----------|-----------|
| H | 2.236739  | -1.251372 | -1.606724 |
| H | -0.661202 | -0.117200 | -0.107777 |
| H | -1.382341 | 1.186523  | -0.578890 |
| H | 1.797472  | 0.722425  | 0.448154  |
| H | 2.942423  | 0.976431  | -0.479528 |
| H | 1.633991  | -1.055867 | -0.824039 |
| H | 0.631301  | -1.155390 | 1.115408  |
| H | -2.977648 | -0.159936 | 2.197592  |
| H | -2.829422 | 0.022271  | 0.700817  |
| H | 1.633225  | -1.199975 | -2.348917 |

**[dwat5-6]**

|   |           |           |           |
|---|-----------|-----------|-----------|
| O | 1.355528  | -1.566244 | 0.048870  |
| O | -1.854051 | -1.495879 | 0.560552  |
| O | 0.021169  | 0.195695  | 1.489021  |
| O | 2.451572  | 1.326339  | 1.098895  |
| O | -1.991828 | 1.648016  | 0.349219  |
| H | 0.870140  | -0.940411 | 0.663727  |
| H | 1.423632  | -1.047325 | -0.754462 |
| H | -1.208548 | -0.863229 | 0.975512  |
| H | -1.254146 | -2.066037 | 0.073794  |
| H | 0.006700  | 0.114779  | 2.445811  |
| H | -1.209628 | 1.266278  | 0.812466  |
| H | 2.876107  | 0.493892  | 0.881408  |
| H | 1.519261  | 1.024592  | 1.254736  |
| H | -2.431000 | 0.842603  | 0.062980  |
